# Supplementary material for: Crystal Structure of Human CD47 in Complex with Engineered SIRPα.D1(N80A)
Source: MDPI journal article supplement (doi:10.3390/molecules27175574), 2022-08-30
Supplement: s1 [file s1]

**Supplemental file:**

**1) Crystal mounting conditions**

| <b>Crystal description</b> | <b>Condition/Cryo</b>          | <b>Protein</b>    | <b>Note</b> |
|----------------------------|--------------------------------|-------------------|-------------|
| IMM01-Fab/CD47his-CSHT-B5  | well solution +20%<br>glycerol | IMM01-Fab/CD47his | <4A         |
| IMM01-Fab/CD47his-CSHT-B5  | well solution +20%<br>glycerol | IMM01-Fab/CD47his | <4A         |
| IMM01-Fab/CD47his-PR-G4    | well solution +20%<br>glycerol | IMM01-Fab/CD47his | <4A         |
| IMM01-Fab/CD47his-PR-G4    | well solution +20%<br>glycerol | IMM01-Fab/CD47his | <4A         |

**2) Diffraction test criteria.**

| <b>Protein/Combination</b> | <b>Beamtime</b> | <b>note<br/>spot</b> | <b>Diffraction<br/>note</b> | <b>Observed<br/>resolution<br/>(Å)</b> | <b>Processed<br/>Space<br/>Group</b> | <b>Processed<br/>Resolution</b> |
|----------------------------|-----------------|----------------------|-----------------------------|----------------------------------------|--------------------------------------|---------------------------------|
| IMM01-Fab/CD47his-CSHT-B5  | APS<br>19IDD    | spots<br>OK          | single<br>lattice           | 2.6                                    | P212121                              | <b>2.76</b>                     |
| IMM01-Fab/CD47his-CSHT-B5  | APS<br>19IDD    | spots<br>OK          | few spots                   | 3                                      | P212121                              | 3.23                            |
| IMM01-Fab/CD47his-PR-G4    | APS<br>19IDD    | spots<br>OK          | few spots                   | 3.7                                    | P422                                 | 3.94                            |
| IMM01-Fab/CD47his-PR-G4    | APS<br>19IDD    | spots<br>OK          | few spots                   | 4.3                                    | P422                                 | 6.39                            |
